# Supplementary material
Source: MDPI journal article supplement (https://www.mdpi.com/1996-1073/14/3/765)
Supplement: s1 [file s1]

Article

# Evaluation of Formate Salt PCM's for Latent Heat Thermal Energy Storage

Samuel Gage <sup>1</sup>, Prashant Sharan <sup>2</sup>, Craig Turchi <sup>1</sup> and Judy Netter <sup>1,\*</sup><sup>1</sup> National Renewable Energy Laboratory; Samuel.Gage@nrel.gov (S.G.); Craig.Turchi@nrel.gov (C.T.)<sup>2</sup> Los Alamos National Laboratory; Prashant.Sharan@lanl.gov

\* Correspondence: Judy.Netter@nrel.gov

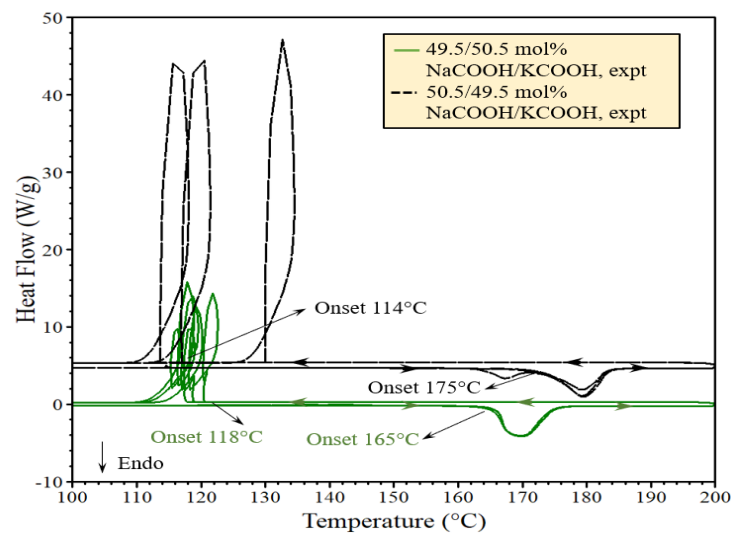

**Figure S1.** DSC graph showing the consequences of supercooling: reduction in net temperature, lower total heat transfer.

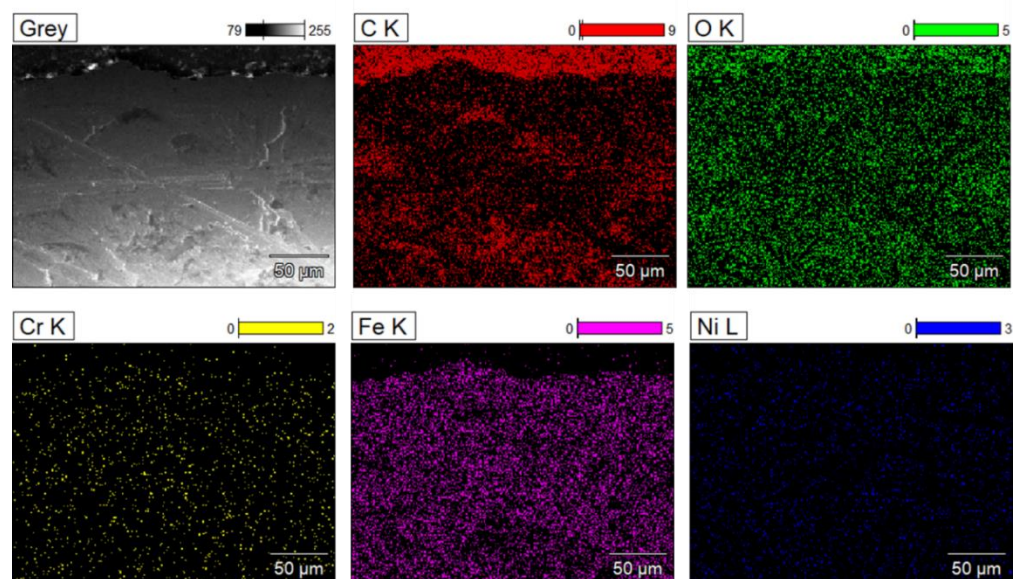

**Figure S2.** Energy dispersive X-ray spectroscopy (EDS) maps of spectra of cross-sectioned carbon steel coupon. The corrosion interface is located near the top of the image with the bulk of the coupon extending toward the bottom of the image. The coupon is mounted in a phenolic resin, which accounts for the high concentration of carbon and oxygen at the top of the image. There is no evidence of chromium-, iron-, or nickel-containing corrosion products at the corrosion interface.

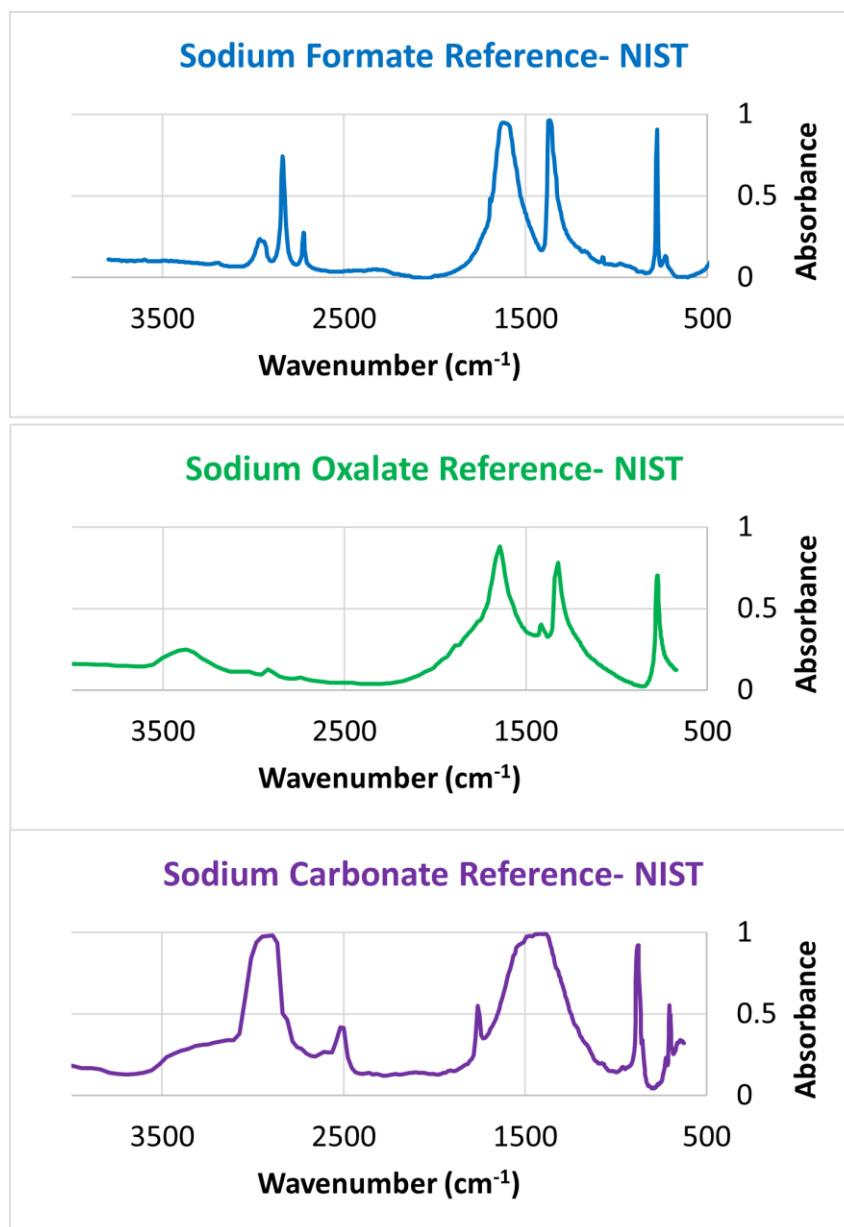

**Figure S3.** FTIR Reference spectra of sodium formate (left), sodium oxalate (middle), and sodium carbonate (right). References taken from the NIST Chemistry WebBook spectral database.
